# Supplementary material for: Intracoronary thrombolysis in ST-elevation myocardial infarction: a systematic review and meta-analysis
Source: PubMed Central journal article supplement — Heart. 2024 Jun 26;110(15):988–96. doi: 10.1136/heartjnl-2024-324078 (PMC11287581; doi:10.1136/heartjnl-2024-324078), 2024-06-26
Supplement: heartjnl-2024-324078supp001.pdf [file heartjnl-2024-324078supp001.pdf]

## Supplementary Figure Legends

Supplementary Figure 1: Risk of bias assessment

Supplementary Figure 2: Forest plot displaying mean difference for left ventricular ejection fraction (LVEF) with intracoronary thrombolysis or placebo in ST-elevation myocardial infarction.

Squares and diamonds= weight mean difference. Lines=95% confidence intervals

Supplementary Figure 3: Forest plot displaying relative risk for heart failure (HF) with intracoronary thrombolysis or placebo in ST-elevation myocardial infarction.

Squares and diamonds= risk ratios. Lines=95% confidence intervals

Supplementary Figure 4: Forest plot displaying relative risk for mortality with intracoronary thrombolysis or placebo in ST-elevation myocardial infarction.

Squares and diamonds= risk ratios. Lines=95% confidence intervals

Supplementary Figure 5: Forest plot of major bleeding with intracoronary thrombolysis or placebo in ST-elevation myocardial infarction.

Squares and diamonds= risk ratios. Lines=95% confidence intervals

Supplementary Figure 6: Forest plot of minor bleeding with intracoronary thrombolysis or placebo in ST-elevation myocardial infarction.

Squares and diamonds= risk ratios. Lines=95% confidence intervals

Supplementary Figure 7: Funnel Plot of SE by log risk ratio, for assessment of publication bias. Open circles represent studies included in the present meta-analysis.

## Supplementary Figure 1

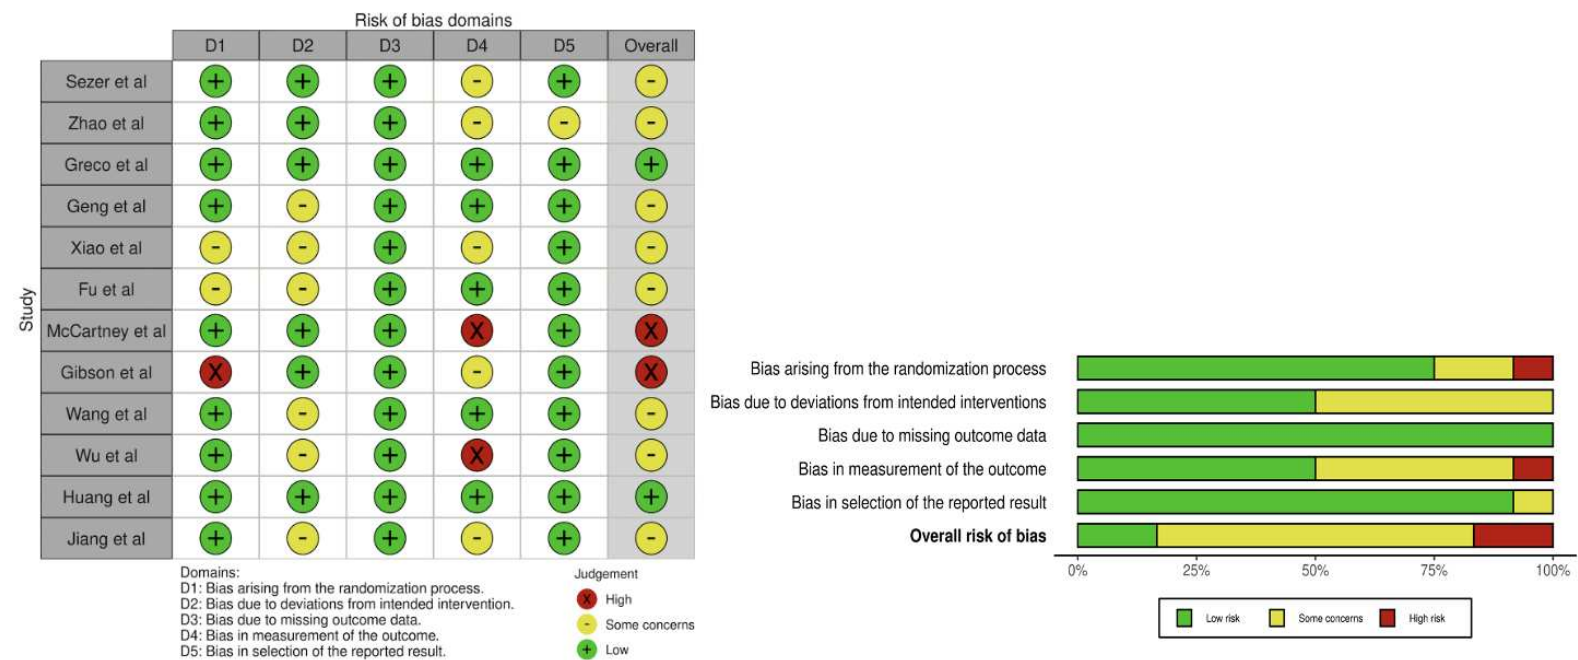

## Supplementary Figure 2

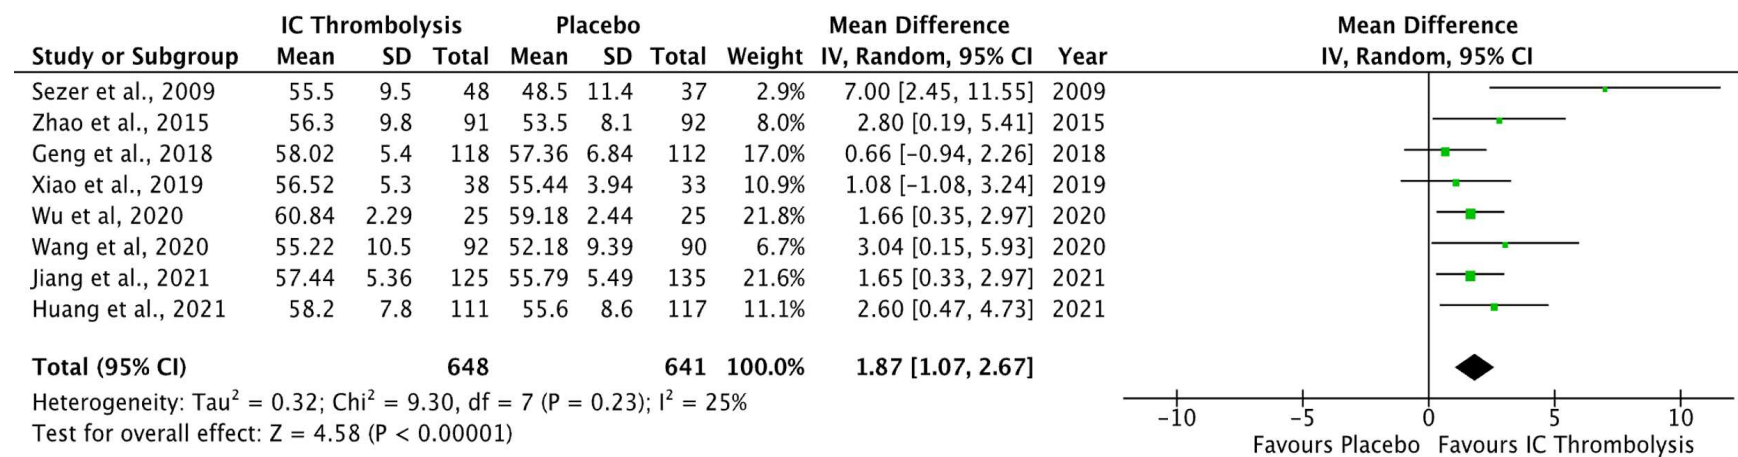

## Supplementary Figure 3

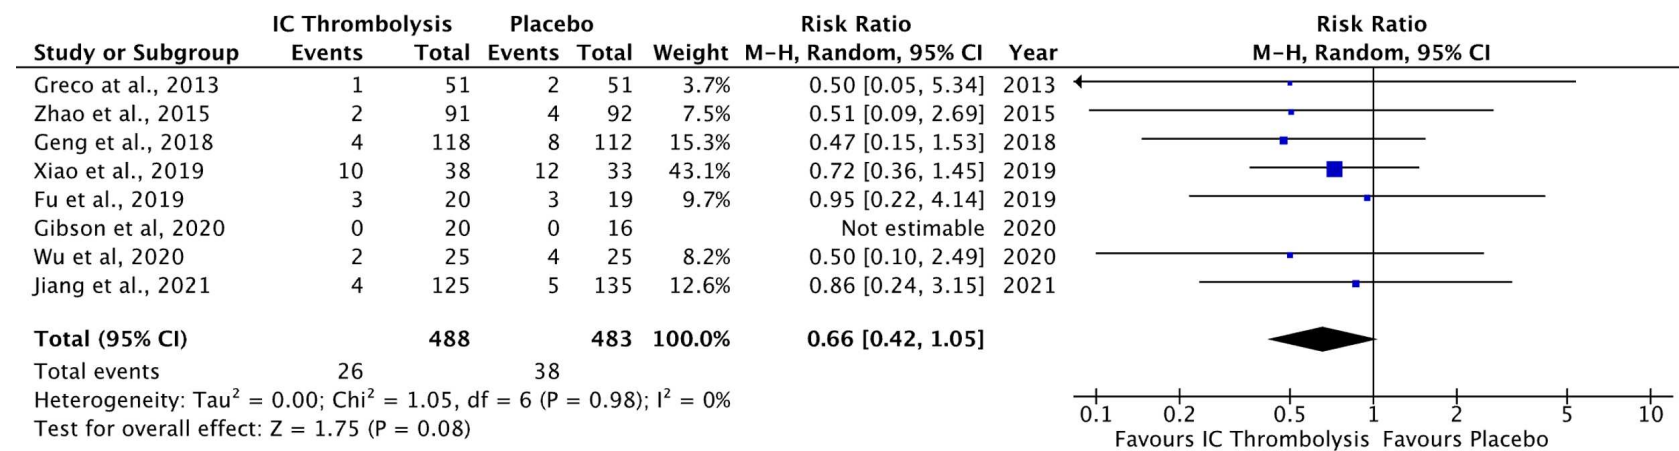

Supplementary Figure 4

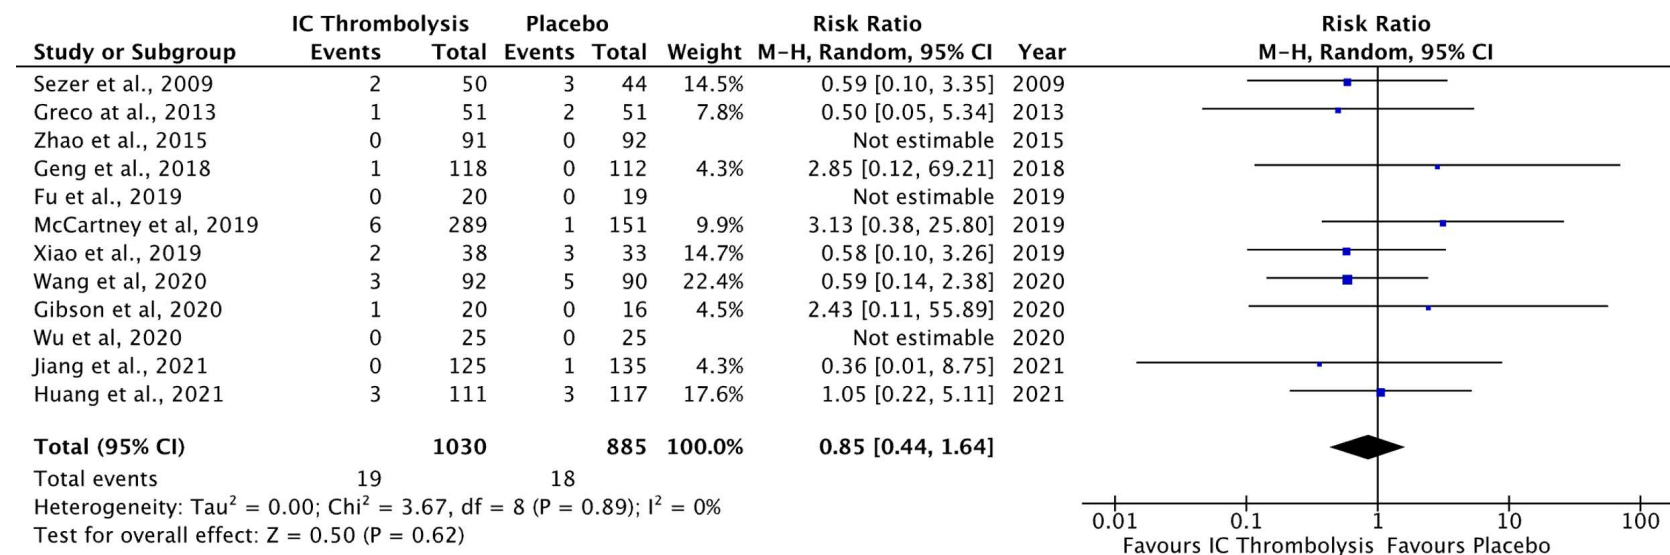

Supplementary Figure 5

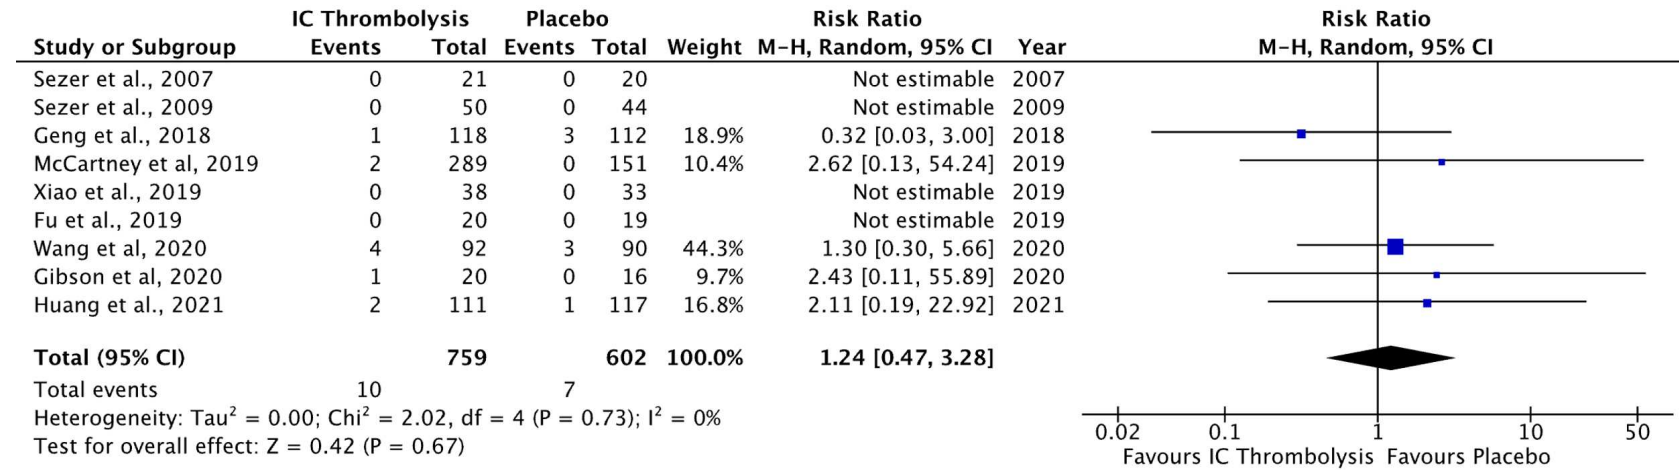

## Supplementary Figure 6

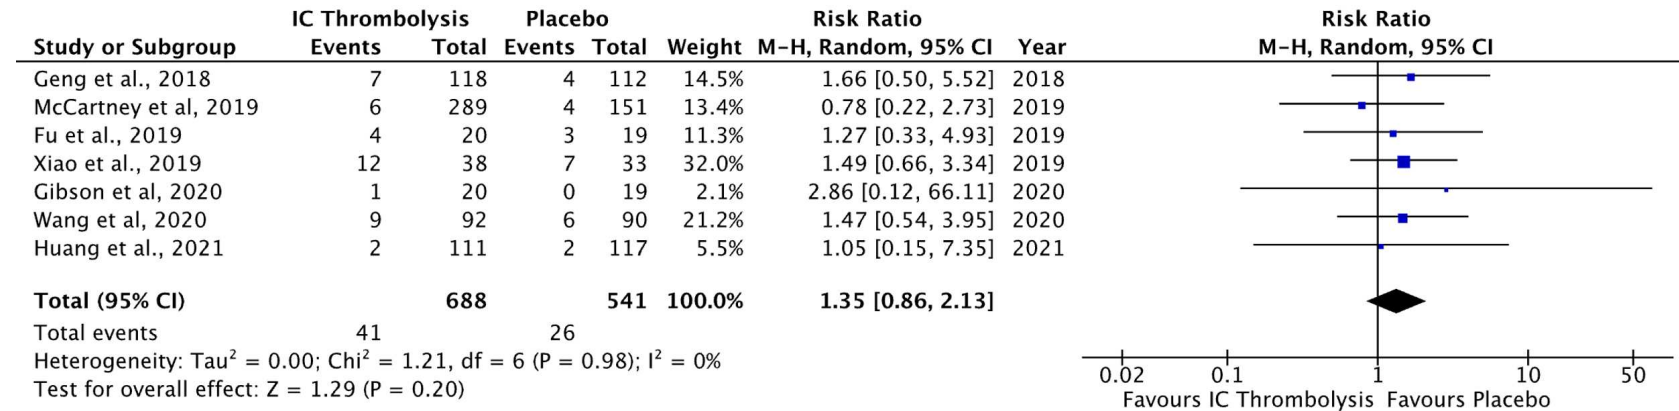

Supplementary Figure 7

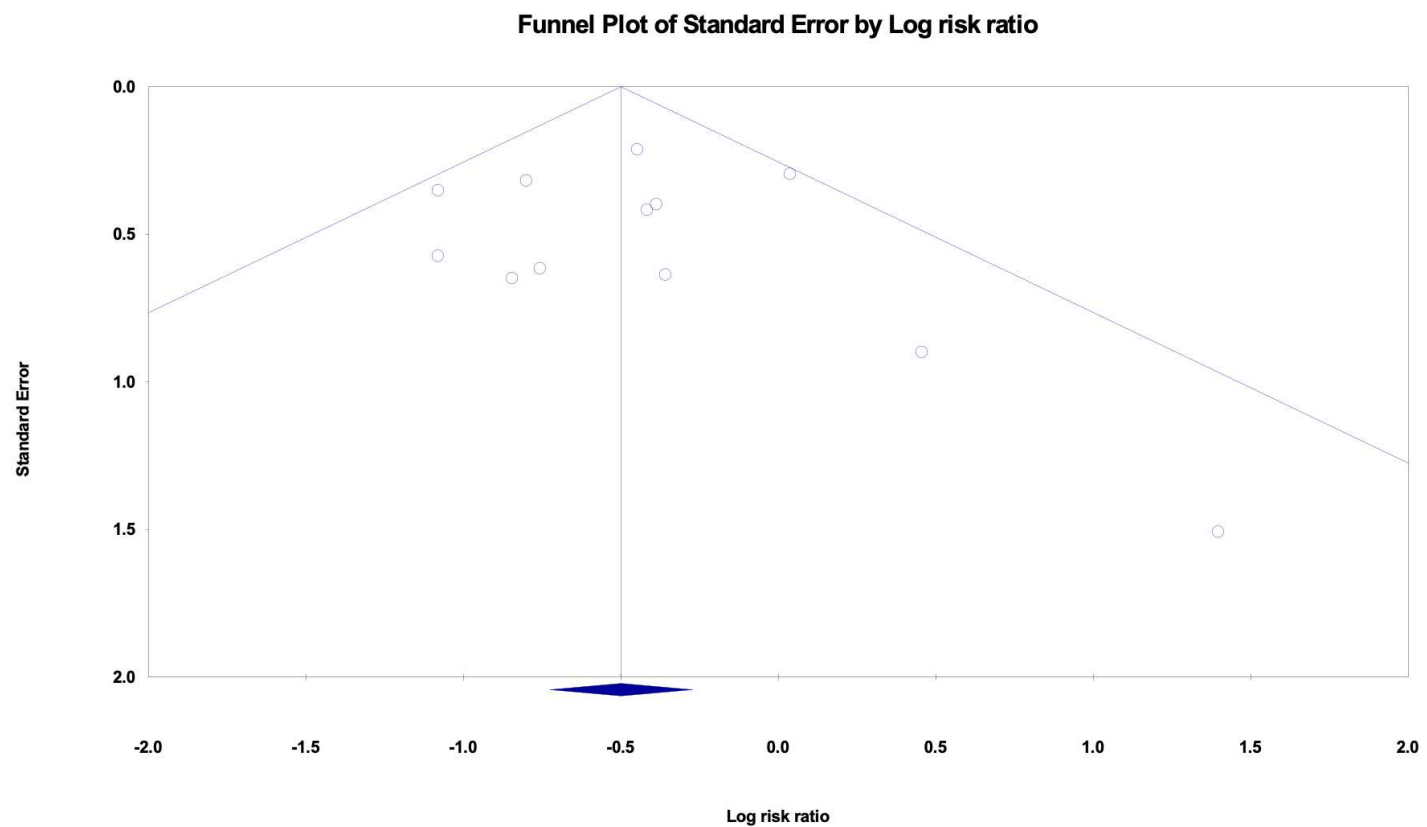



### Supplementary Table Legends

Supplementary Table 1: Individual components of MACE as defined by each individual study. Abbreviations, MACE: major adverse clinical events, MI: myocardial infarction, TVR: target vessel revascularisation

\*Includes repeat hospitalisation

\*\*Includes new onset HF and/or hospitalisation for HF

Supplementary Table 2: Summary of outcomes in studies investigating intracoronary thrombolysis for STEMI patients. Abbreviations, TG: thrombolysis group, CG: control group, MACE: major adverse clinical events, LVEF: left ventricular ejection fraction, TIMI: thrombolysis in myocardial infarction, TMPG: TIMI myocardial perfusion grade, CTFC: corrected TIMI frame count, NR: not reported

Supplementary Table 1

| Study                  | Mortality | Cardiac Mortality | MI/Reinfarction | Angina | TVR | Stent thrombosis | Heart Failure | Malignant Arrhythmia | Stroke |
|------------------------|-----------|-------------------|-----------------|--------|-----|------------------|---------------|----------------------|--------|
| <b>Sezer et al</b>     | No        | Yes               | Yes             | No     | Yes | No               | No            | No                   | No     |
| <b>Zhao et al</b>      | Yes       | No                | No              | Yes    | Yes | No               | Yes           | No                   | Yes    |
| <b>Greco et al</b>     | Yes       | No                | Yes             | No     | No  | No               | Yes**         | No                   | No     |
| <b>Geng et al</b>      | No        | Yes               | Yes             | Yes    | No  | Yes              | Yes           | No                   | No     |
| <b>Xiao et al</b>      | No        | Yes               | No              | No     | Yes | No               | Yes           | Yes                  | No     |
| <b>Fu et al</b>        | No        | Yes               | Yes             | No     | No  | Yes              | Yes           | Yes                  | Yes    |
| <b>McCartney et al</b> | No        | Yes               | Yes             | No     | No  | No               | Yes           | No                   | No     |
| <b>Gibson et al*</b>   | Yes       | No                | Yes             | No     | No  | No               | Yes           | Yes                  | No     |
| <b>Wang et al</b>      | No        | Yes               | Yes             | No     | Yes | No               | No            | No                   | No     |
| <b>Wu et al</b>        | No        | Yes               | Yes             | No     | Yes | No               | Yes           | Yes                  | No     |
| <b>Huang et al</b>     | No        | Yes               | Yes             | No     | Yes | No               | No            | No                   | No     |
| <b>Jiang et al</b>     | No        | Yes               | Yes             | Yes    | No  | Yes              | Yes           | No                   | No     |

Supplementary Table 2

| Study           | Group | MACE (N =) | LVEF (mean $\pm$ SD)* | Heart Failure (N =) | Mortality (N =) | Major Bleeding (N =) | Minor Bleeding (N =) | TIMI flow grade >3 (N =) | TMPG > 3 (N =) | ST-resolution (N =) | CTFC (mean $\pm$ SD) |
|-----------------|-------|------------|-----------------------|---------------------|-----------------|----------------------|----------------------|--------------------------|----------------|---------------------|----------------------|
| Sezer et al     | TG    | 4          | 55.5 $\pm$ 9.5        | NR                  | 2               | 0                    | NR                   | 46                       | 20             | 47                  | 29.9 $\pm$ 9.2       |
|                 | CG    | 5          | 48.5 $\pm$ 11.4       | NR                  | 3               | 0                    | NR                   | 39                       | 7              | 37                  | 31.2 $\pm$ 8.7       |
| Zhao et al      | TG    | 4          | 56.3 $\pm$ 9.8        | 2                   | 0               | NR                   | NR                   | 83                       | NR             | 85                  | 21.2 $\pm$ 10.7      |
|                 | CG    | 12         | 53.5 $\pm$ 8.1        | 4                   | 0               | NR                   | NR                   | 71                       | NR             | 76                  | 29.6 $\pm$ 15.3      |
| Greco et al     | TG    | 3          | NR                    | 1                   | 1               | NR                   | NR                   | 46                       | 35             | 42                  | 19 $\pm$ 15          |
|                 | CG    | 11         | NR                    | 2                   | 2               | NR                   | NR                   | 34                       | 24             | 28                  | 25 $\pm$ 17          |
| Geng et al      | TG    | 10         | 58 $\pm$ 5.4          | 4                   | 1               | 1                    | 7                    | 109                      | NR             | 105                 | NR                   |
|                 | CG    | 14         | 57.3 $\pm$ 6.8        | 8                   | 0               | 3                    | 4                    | 96                       | NR             | 89                  | NR                   |
| Xiao et al      | TG    | 17         | 53.2 $\pm$ 5.5        | 10                  | 2               | 0                    | 12                   | 37                       | 35             | NR                  | 23.05 $\pm$ 5.35     |
|                 | CG    | 23         | 51.6 $\pm$ 6          | 12                  | 1               | 0                    | 7                    | 29                       | 24             | NR                  | 26.51 $\pm$ 4.95     |
| Fu et al        | TG    | 3          | 52.4 $\pm$ 12.2       | 3                   | 0               | 0                    | 4                    | 17                       | 16             | 15                  | 21.7 $\pm$ 10.2      |
|                 | CG    | 6          | 49.9 $\pm$ 11.5       | 3                   | 0               | 0                    | 3                    | 10                       | 9              | 14                  | 28.59 $\pm$ 9.94     |
| McCartney et al | TG    | 30         | NR                    | NR                  | 3               | 2                    | 6                    | 227                      | 70             | NR                  | NR                   |
|                 | CG    | 15         | NR                    | NR                  | 143             | 0                    | 4                    | 125                      | 43             | NR                  | NR                   |
| Gibson et al    | TG    | 2          | NR                    | 0                   | 1               | 1                    | 1                    | 17                       | 9              | NR                  | NR                   |

|                    |    |    |            |    |   |    |    |     |    |     |           |
|--------------------|----|----|------------|----|---|----|----|-----|----|-----|-----------|
|                    | CG | 0  | NR         | 0  | 0 | 0  | 0  | 15  | 2  | NR  | NR        |
| <b>Wang et al</b>  | TG | 10 | 55.2±10.5  | NR | 3 | 4  | 9  | 82  | 53 | 52  | 19.6±9.1  |
|                    | CG | 20 | 52.2±9.4   | NR | 5 | 3  | 6  | 72  | 35 | 35  | 22.9±10.2 |
| <b>Wu et al</b>    | TG | 3  | 60.9±2.3   | 2  | 0 | NR | NR | 22  | 21 | 24  | 16.7±7.3  |
|                    | CG | 7  | 59.2±2.4   | 4  | 0 | NR | NR | 20  | 10 | 16  | 19.1±6.7  |
| <b>Huang et al</b> | TG | 3  | 58.2±7.8   | NR | 3 | 2  | 2  | 101 | 38 | 64  | 27.1±14.2 |
|                    | CG | 2  | 55.6 ± 8.6 | NR | 2 | 1  | 2  | 90  | 26 | 45  | 34.6±18.3 |
| <b>Jiang et al</b> | TG | 8  | 57.4±5.4   | 4  | 0 | NR | NR | 123 | NR | 114 | NR        |
|                    | CG | 13 | 55.8±5.5   | 5  | 1 | NR | NR | 130 | NR | 109 | NR        |
